# Supplementary material for: Liquid metal soft electrode triggered discharge plasma in aqueous solution
Source: Royal Society of Chemistry journal article supplement (doi:10.1039/c6ra23238h), 2016-01-01
Supplement: c6ra23238h1.pdf [file c6ra23238h1.pdf]

## Supplementary Information

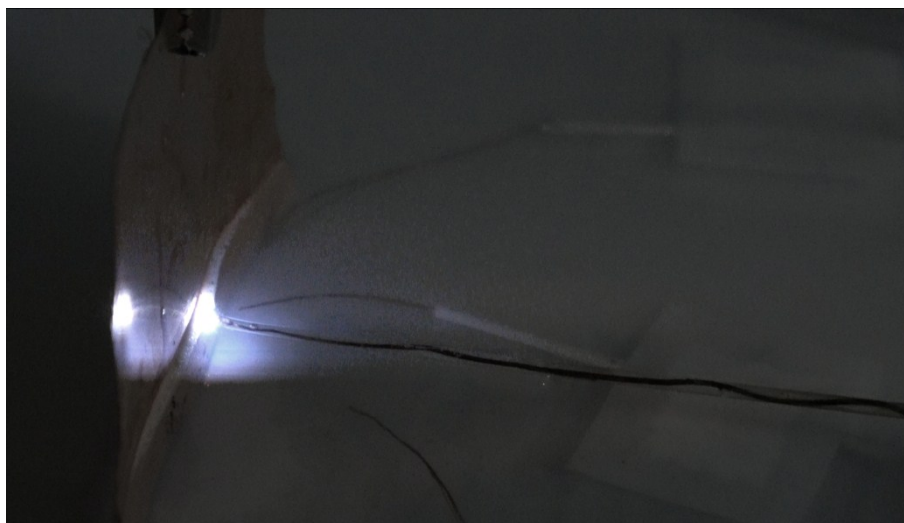

Figure S1. The light triggered by the solid copper wire electrode.

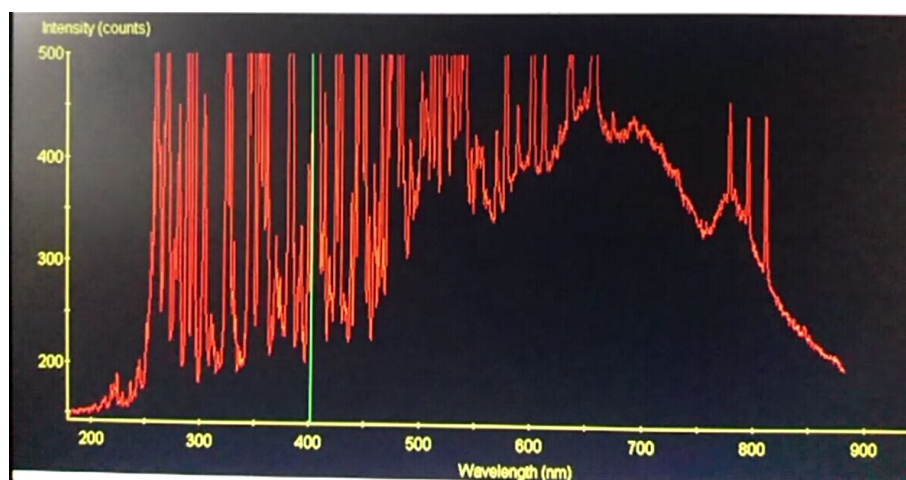

Figure S2. Optical emission spectrum of the light triggered by the solid copper wire electrode in SDS solution

**The Supplementary Movie 1:** The plasma triggered by the static liquid metal electrode using the set-up in Figure 1.

**The Supplementary Movie 2:** The control experiment with solid copper wire electrode using the set-up in Figure 1.

**The Supplementary Movie 3:** The close view of the liquid metal jetting stream recorded by the high-speed camera. The liquid metal is jetted from the positive end to the negative end of the circuit and the voltage is 20V. The stream is in 10g/L SDS solution.

**The Supplementary Movie 4:** The liquid metal is jetted from the negative end to the positive end of the circuit and the voltage is 20V. The stream is in 10g/L

SDS solution.

**The Supplementary Movie 5:** The liquid metal is jetted from the positive end to the negative end of the circuit and the voltage is 20V. The stream is in the deionized water. The distance between the two copper plates is cut by half.

**The Supplementary Movie 6:** The liquid metal is jetted from the positive end to the negative end of the circuit and the voltage is 20V. The stream is in 0.25mol/L NaCl solution.
